# Supplementary material for: Trimethylamine N-Oxide Exacerbates Neuroinflammation and Motor Dysfunction in an Acute MPTP Mice Model of Parkinson’s Disease
Source: MDPI journal article supplement (doi:10.3390/brainsci13050790), 2023-05-12
Supplement: s1 [file s1]

**Supplementary materials:**

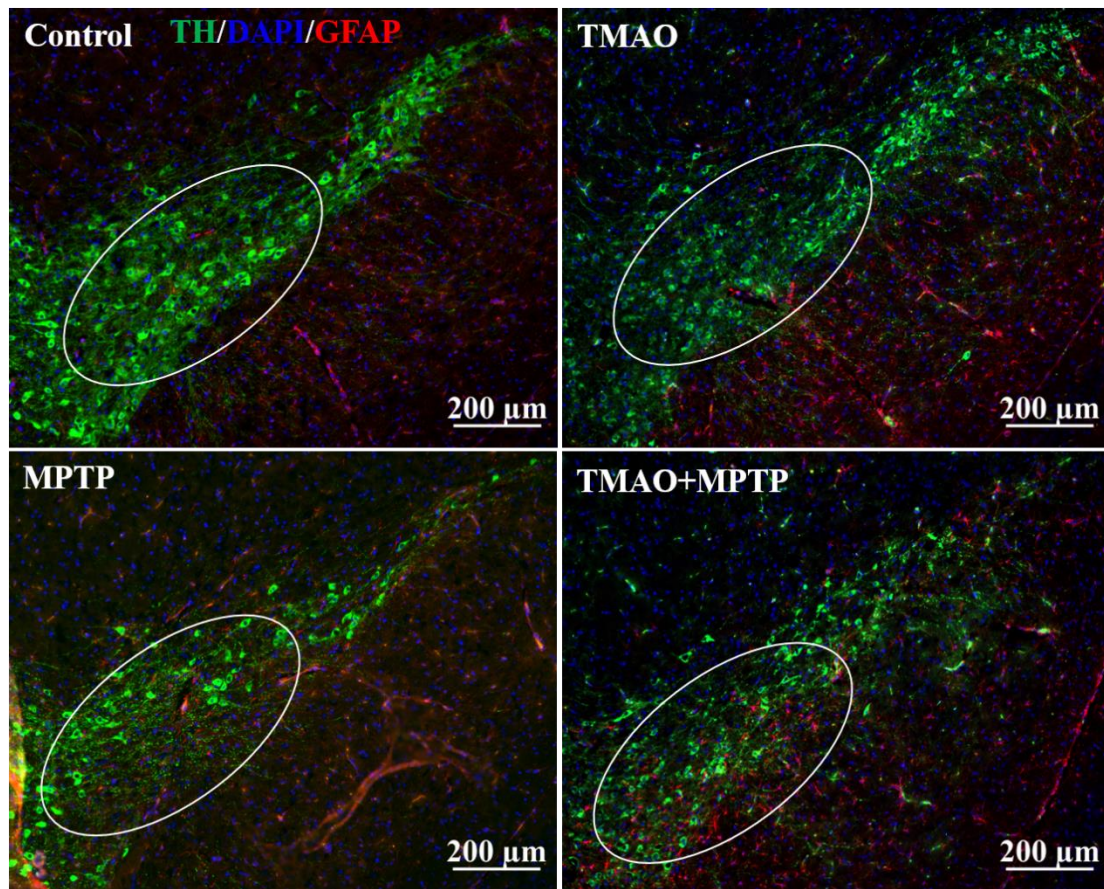

**Figure S1: Double immunofluorescence staining images for TH and GFAP in the substantia nigra.** Representative photomicrographs of TH (dopaminergic neuron marker, green) and GFAP (astrocytes marker, red) staining in the substantia nigra. The scale bar is 200 μm.

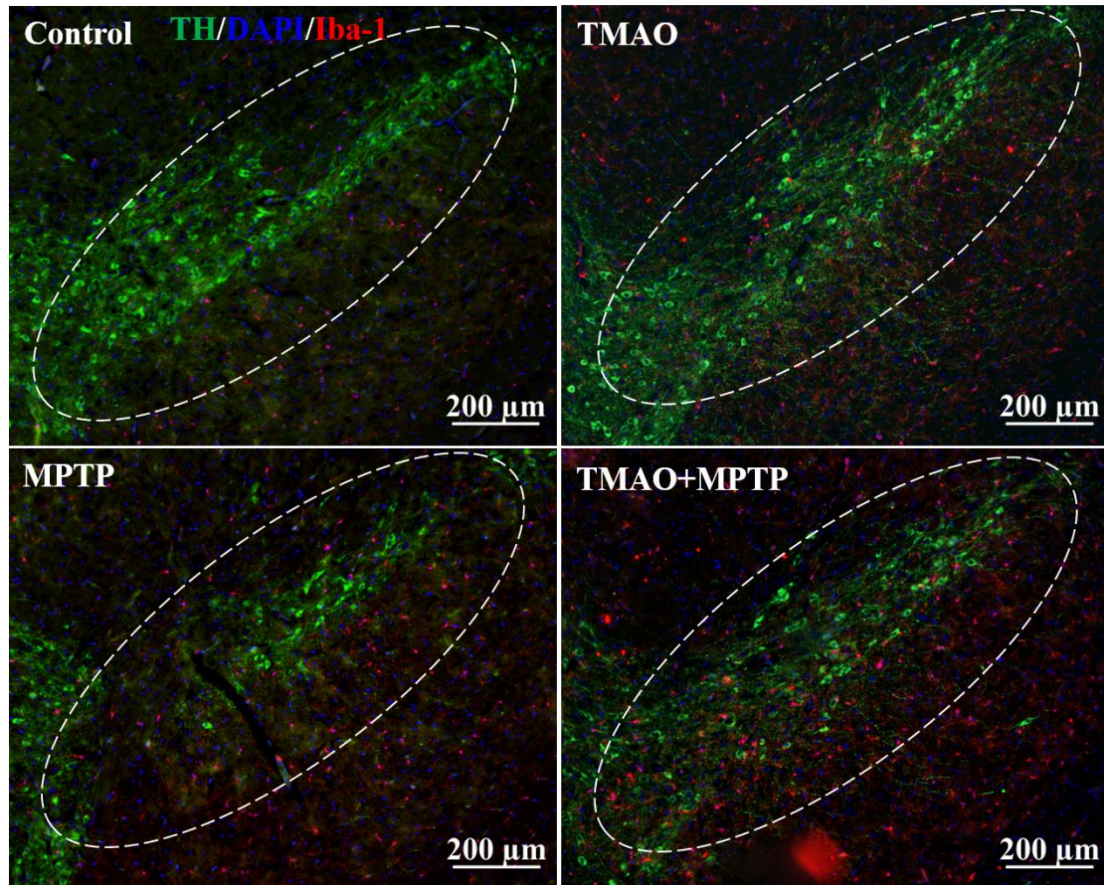

**Figure S2: Double immunofluorescence staining images for TH and Iba-1 in the substantia nigra.** Representative photomicrographs of TH (dopaminergic neuron marker, green) and Iba-1 (microglia marker, red) staining in the substantia nigra. The scale bar is 200  $\mu\text{m}$ .
